# Supplementary material
Source: HighWire-hosted journal article supplement (https://genome.cshlp.org/content/suppl/2003/09/10/13.10.2341)
Supplement: Mousses-14787_supp_1.pdf [file Mousses-14787_supp_1.pdf]

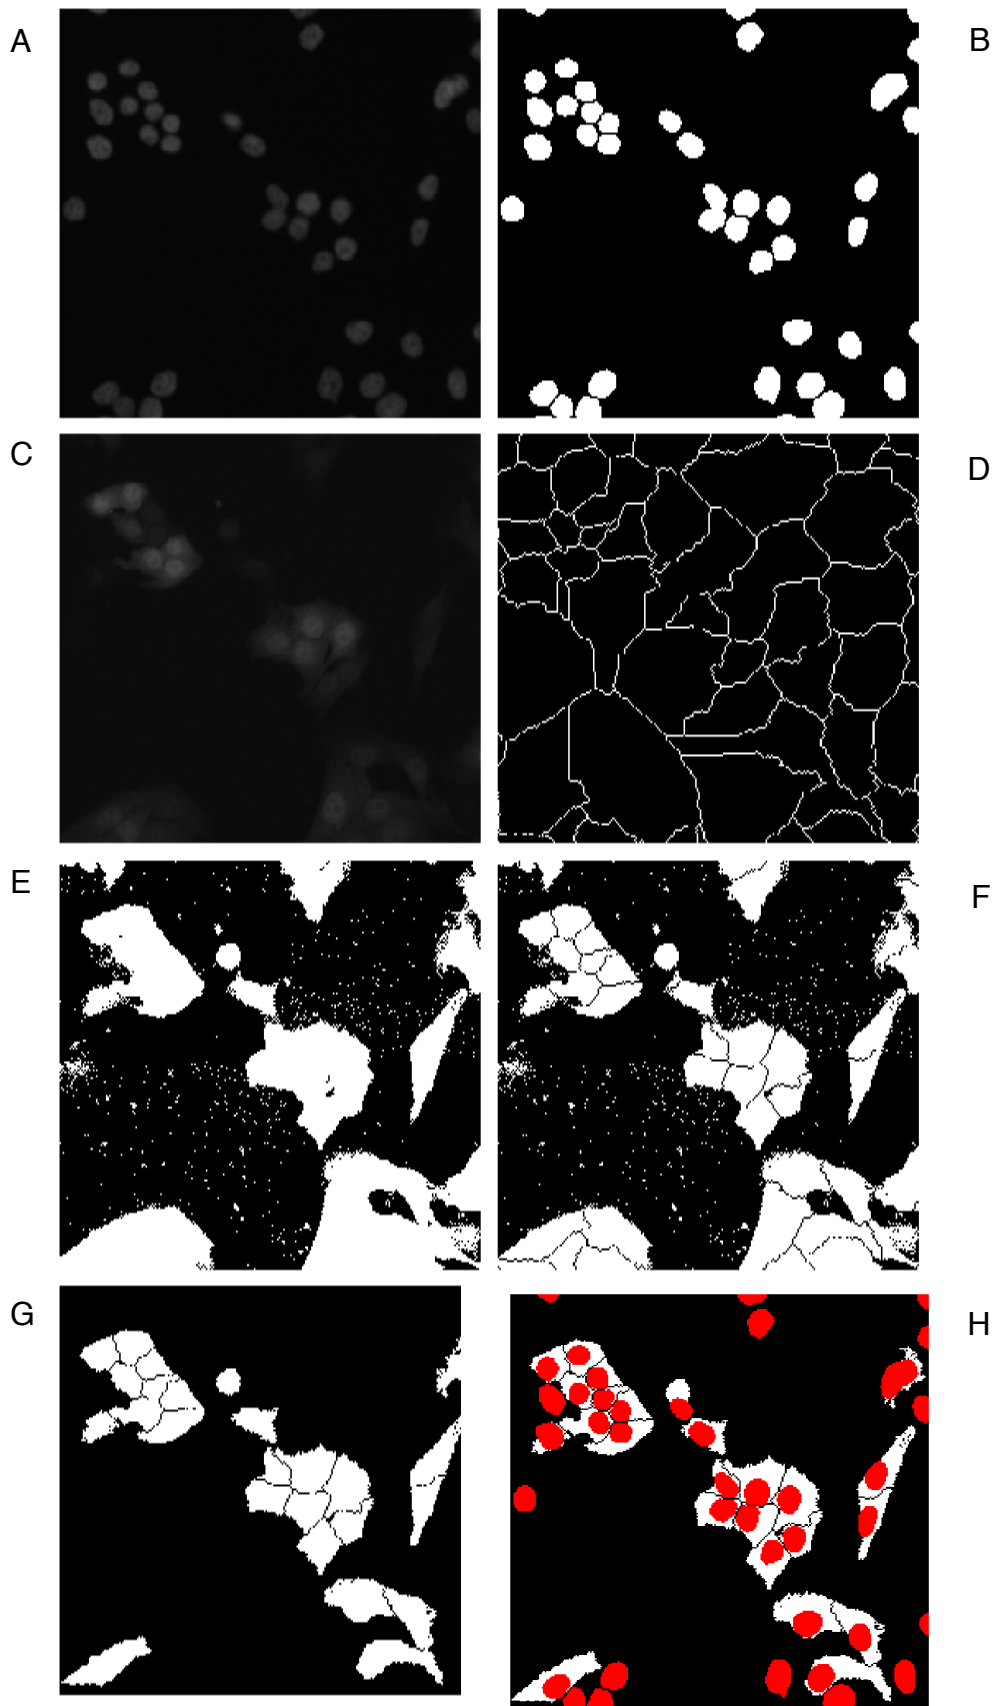

FIGURE A

#### Selected Steps in the Cell Area Segmentation Process

A) DAPI Image, B) Binary Image produced from thresholding of A.

C) Green Image, D) Watershed lines based on locating markers in B and the intensity gradients in C.

E) Binary Image produced from thresholding of C.

F) Union of D & E G) Segmented cell areas only in the green channel after final processing.

H) Union of B & G
